1 **A critical role for E2-p53 interaction during the HPV16 life cycle**

2 Christian T. Fontan<sup>1</sup>, Claire D. James<sup>1</sup>, Molly L. Bristol<sup>1,4</sup>, Apurva T. Prabhakar<sup>1</sup>, Raymonde Otoa<sup>1</sup>,  
3 Xu Wang<sup>1</sup>, Elmira Karimi<sup>1</sup>, Pavithra Rajagopalan<sup>2</sup>, Devraj Basu<sup>2,3</sup> and Iain M. Morgan<sup>1,4\*</sup>.

<sup>1</sup>Virginia Commonwealth University (VCU), Philips Institute for Oral Health Research, School of  
Dentistry, Richmond, VA, 23298

<sup>2</sup>Department of Otorhinolaryngology, University of Pennsylvania, Philadelphia, PA 19104

<sup>3</sup>The Wistar Institute Cancer Center, Philadelphia, PA 19104

4 <sup>4</sup>VCU Massey Cancer Center, Richmond, VA, 23298

5 \*corresponding author, [immorgan@vcu.edu](mailto:immorgan@vcu.edu)

6 Keywords: human papillomavirus, E2, p53, cervical cancer, head and neck cancer, life cycle,

7 comet assay, senescence, interaction.

8

9 **Abstract**

10 Human papillomaviruses (HPV) are causative agents in ano-genital and oral cancers; HPV16 is  
11 the most prevalent type detected in human cancers. The HPV16 E6 protein targets p53 for  
12 proteasomal degradation to facilitate proliferation of the HPV16 infected cell. However, in HPV16  
13 immortalized cells E6 is predominantly spliced (E6\*) and unable to degrade p53. Here we  
14 demonstrate that human foreskin keratinocytes immortalized by HPV16 (HFK+HPV16), and  
15 HPV16 positive oropharyngeal cancers, retain significant expression of p53. In addition, p53  
16 levels can be increased in HPV16+ head and neck cancer cell lines following treatment with  
17 cisplatin. Introduction of full-length E6 into HFK+HPV16 resulted in attenuation of cellular growth  
18 (in hTERT immortalized HFK, E6 expression promoted enhanced proliferation). An understudied  
19 interaction is that between E2 and p53 and we investigated whether this was important for the  
20 viral life cycle. We generated mutant genomes with E2 unable to interact with p53 resulting in  
21 profound phenotypes in primary HFK. The mutant induced hyper-proliferation, but an ultimate  
22 arrest of cell growth;  $\beta$ -galactosidase staining demonstrated increased senescence, and COMET  
23 assays showed increased DNA damage compared with HFK+HPV16 wild type cells. There was  
24 failure of the viral life cycle in organotypic rafts with the mutant HFK resulting in premature  
25 differentiation and reduced proliferation. The results indicate that the E2-p53 interaction is critical  
26 during the HPV16 life cycle, and that disruption of this interaction has anti-viral potential. We  
27 discuss potential mechanisms to explain these phenotypes.

28

29

30

31

32

### 33 **Importance**

34 Human papillomaviruses are causative agents in around 5% of all cancers. There are currently  
35 no antivirals available to combat these infections and cancers, therefore it remains a priority to  
36 enhance our understanding of the HPV life cycle. Here we demonstrate that an interaction  
37 between the viral replication/transcription/segregation factor E2 and the tumor suppressor p53 is  
38 critical for the HPV16 life cycle. HPV16 immortalized cells retain significant expression of p53,  
39 and the critical role for the E2-p53 interaction demonstrates why this is the case. If the E2-p53  
40 interaction is disrupted then HPV16 immortalized cells fail to proliferate, have enhanced DNA  
41 damage and senescence, and there is premature differentiation during the viral life cycle. Results  
42 suggest that targeting the E2-p53 interaction would have therapeutic benefits, potentially  
43 attenuating the spread of HPV16.

44

45

46

47

48

49

50

51

52

53

54

55

56

57

58

59

60 **Introduction:**

61 HPV16 infection causes half of cervical cancers and up to 90% of HPV-positive oropharyngeal  
62 cancers (1). Despite advances in vaccination, the prevalence in HPV-associated oropharyngeal  
63 cancer continues to rise, contributing to an ongoing public health crisis without any effective anti-  
64 viral therapies (2-5).

65 HPV infects basal epithelial cells and delivers its circular 8kbp DNA genome into the nucleus of  
66 the host. Consequently, cellular host factors initiate transcription from the viral long control region  
67 (LCR) (6). The viral mRNA is expressed from a single transcript which is then processed, spliced  
68 and translated into individual viral proteins. In high-risk HPV infection, the viral oncoproteins E6  
69 and E7 contribute to cellular transformation and cancer progression by targeting several cellular  
70 proteins, including tumor suppressors p53 and pRb respectively (7-11).

71 HPV uses two proteins to initiate replication of the viral episome. The E2 protein homodimerizes  
72 via a carboxyl terminus domain and binds to four 12-bp palindromic sequences within the viral  
73 LCR and origin (12). Via its amino terminus, E2 recruits the viral helicase E1 to the origin which  
74 forms a di-hexamer that replicates the viral genome with the assistance of host polymerases (13,  
75 14). Upon initial infection, the HPV genome replicates to 20-50 copies and maintains this copy  
76 number as the infected cell migrates through the epithelium. As the infected cell differentiates and  
77 reaches the upper layers, the viral genome amplifies and expresses the L1 and L2 capsid proteins  
78 that promote virus assembly and shedding (15-17).

79 E2 has additional roles in the viral life cycle. E2 can promote or repress viral transcription  
80 depending on protein concentration (18). E2 binds to host mitotic chromatin to facilitate viral  
81 segregation, resulting in sorting of viral episomes into daughter nuclei following mitosis (19). E2  
82 also regulates expression of host genes important in the viral life cycle and cancer progression  
83 (20-24).

84 The tumor suppressor p53 primarily functions as a transcription regulatory factor during cellular  
85 stress and DNA-damage, leading to cell cycle arrest, senescence, and apoptosis (25-30). In HPV  
86 infection, the 150 amino acid E6 oncoprotein interferes with the transcriptional activity of tumor  
87 suppressor p53, as well as induces its degradation (7, 9, 31). Direct degradation is initiated by  
88 the formation of a complex with p53 and the host partner protein E6AP, which is an ubiquitin  
89 ligase. E6 directs the ligase activity of E6AP to p53, promoting its degradation via the proteasome  
90 (7, 31-33). This is in direct contrast with many HPV-negative cancers where p53 often becomes  
91 mutationally inactivated (34, 35). The degradation of p53 by HPV is also regulated by alternative  
92 splicing of high-risk E6 proteins, resulting in a short modulatory isoforms of the oncoprotein such  
93 as E6\* and E6\*I which do not bind to p53 and can inhibit E6-E6AP-p53 complex formation  
94 preventing p53 degradation in a cell-cycle specific manner (36-38). We, and others, have reported  
95 that expression of alternatively spliced forms of E6 are more dominant compared to full-length E6  
96 in HPV-positive head and neck cancer, and ectopic expression of these isoforms have anti-  
97 tumorigenic effects (38-41). The disruption of the E6-E6AP-p53 degradation complex by E6\* and  
98 E6\*I, allowing for p53 expression, suggests that p53 expression may be important in HPV  
99 immortalized cells.

100 Another reported viral interactor with p53 is E2. E2 proteins from high-risk HPVs can bind to p53  
101 and this interaction can trigger apoptosis in cervical cancer cells (42, 43). Additionally, E2  
102 replication function is regulated by this interaction with p53 as overexpression of p53 reduces viral  
103 replication (44). This led us to hypothesize that in HPV16 immortalized cells, residual p53 is  
104 necessary to maintain a healthy viral life cycle, perhaps via an interaction with E2.

105 Here, we demonstrate that p53 expression is clearly detectable in a variety of cell lines and tumors  
106 immortalized by HPV16 (45, 46). Depletion of residual p53 by overexpression of full length E6  
107 protein led to a significant reduction in cellular proliferation in keratinocytes immortalized by wild-  
108 type HPV16. Expression of a mutant E6 protein lacking p53 binding had no effect on cell growth.

109 To determine whether an interaction between E2 and p53 was important for cellular proliferation  
110 of HPV16 positive cells, we generated an HPV16 genome with point mutations in the E2 gene  
111 eliminating p53 binding (42, 43). Keratinocytes were then immortalized by this mutant.  
112 Remarkably, compared to wild type HPV16, E2<sup>-p53</sup> mutant cells, following an initial burst in  
113 proliferation, stopped growing and had increased levels of senescence, and accumulated DNA  
114 breaks as evidence by single-cell gel electrophoresis assay (COMET). When subjected to  
115 differentiation via organotypic raft culturing, these mutant cells had reduced proliferation leading  
116 to marked reduction in raft thickness. There was also a reduction in viral replication markers in  
117 the mutant cells. These results suggest that although p53 is downregulated by E6 in high-risk  
118 HPV infection, p53 is still necessary to permit HPV induced proliferation and that the interaction  
119 with E2 plays an important role in the requirement for p53 expression.

120

## 121 **Results:**

### 122 **Tumor Suppressor p53 is expressed in HPV16 immortalized cells and is critical for their** 123 **optimal growth.**

124 Previous studies demonstrated that alternative splice variants (E6\*) are the dominant E6  
125 transcripts in HPV associated head and neck cancer, preventing E6-E6AP-p53 complex formation  
126 and inhibiting p53 degradation (36-41). We confirmed the presence of p53 in a series of HPV16  
127 positive cell lines (Fig. 1). Expression of the entire HPV16 full genome in N/Tert-1 cells results in  
128 partial reduction in p53 compared to near complete abrogation by expression of HPV16 E6 and  
129 E7 (Fig. 1A compare lanes 2 and 4 to lane 1). Moreover, human tonsil cells immortalized by  
130 HPV16 retain p53 expression near N/Tert-1 control cells (compare lane 1 to 3). To further  
131 investigate these findings, we studied two independent donors of human foreskin keratinocytes  
132 (HFK) immortalized with HPV16. In both donor lines, p53 levels were much less reduced

133 compared to HFK immortalized by HPV16 E6 and E7 overexpression (Lanes 5-8). To determine  
134 whether this expression is affected by tumor microenvironment, we surveyed p53 expression in  
135 8 patient derived xenografts (PDX) from oropharyngeal and oral cavity carcinomas (four HPV16  
136 positive and four negative) (45, 46). All HPV16 positive PDX samples and 3 out of 4 HPV negative  
137 retained detectable p53 expression illustrating no clear association between HPV status and p53  
138 expression (Fig. 1B). Platinum based DNA-damaging agents such as cisplatin are critical in the  
139 treatment of late stage systemic head and neck cancers (47-50). Because DNA-damage is known  
140 to stabilize and activate p53, and p53 is most often wild-type in HPV-positive cancers, we  
141 predicted that in HPV+ head and neck cancer cell lines the expression of active wild-type p53 can  
142 be promoted by cisplatin treatment. We confirmed dose-dependent cisplatin induced p53  
143 expression in SCC-47 and SCC-104 cells (Fig. 1C). These results indicate that p53 expression is  
144 conserved in many cell lines immortalized by the HPV16 genome and can be induced by  
145 treatment with DNA-damage. This suggests that although E6 degrades p53 to help promote cell  
146 immortalization and carcinogenesis, p53 often retains expression under a variety of conditions,  
147 indicating that it still may play an important role in the HPV16 life-cycle.

148 To determine whether reduction of p53 would compromise the growth of HPV16 immortalized  
149 cells we introduced full length E6 (using a retroviral delivery of the E6 gene which does not allow  
150 alternative splicing) into N/Tert-1 (foreskin keratinocytes immortalized by telomerase) and  
151 HFK+HPV16 cells. Fig. 2A demonstrates that the additional expression of E6 in N/Tert-1 cells  
152 results in significantly increased cellular proliferation as has been described (51). However,  
153 introduction of E6 into HFK+HPV16 resulted in an attenuation of cell growth (Fig. 2B). Because  
154 E6 possesses a variety of mechanisms for regulating cellular proliferation independent from p53  
155 degradation, we attempted to isolate these other mechanisms by expressing an E6 mutant unable  
156 to promote degradation of p53 but retains all other known functions (52). This mutant did not have  
157 a deleterious effect on cell growth indicating that it is the E6 targeting of p53 that results in the

158 attenuation of cellular proliferation. Additionally, we found that these proliferation rates were  
159 inversely correlated with senescence levels (Fig. 2C and 2D). In the HFK+HPV16+E6 cells, we  
160 noticed that over time the cells began proliferating once again. To determine whether the  
161 recovered cells had a restoration of p53 protein levels we carried out western blots of  
162 HFK+HPV16+E6 cells at different stages following E6 introduction (Fig. 2E). Lane 4 demonstrates  
163 that there is an initial reduction in p53 protein levels in these cells immediately following selection  
164 compared with control cells (compare lane 4 with lane 3). However, following 13 days of culturing  
165 (when we noticed proliferation begin to restore to that of the control cells) there is a restoration of  
166 p53 protein expression (compare lane 7 with lane 4). These results suggest that reduction of p53  
167 protein may lead to growth attenuation and enhanced senescence of HFK+HPV16 cells. They  
168 also suggest that to begin to proliferate again, restoration of p53 likely helps promote growth in  
169 the HFK+HPV16+E6 cells. We monitored the exogenous E6 RNA levels (Fig 2F). There is a clear  
170 reduction in the E6 RNA expressed from the exogenous vector between days 0 and 13 correlating  
171 with the restoration of p53 protein expression and cellular proliferation. When we analyzed for E6  
172 protein expression via western blot, while we did not notice an appreciable change in E6 protein  
173 levels, we found that there was a significant increase of E6 $\Delta$ p53 expression compared to wild-  
174 type E6 at both time points (Fig. 2G). This supports our claim that expression of E6 is more  
175 deleterious to growth than E6 $\Delta$ p53 in HFK+HPV16 and this is most likely due to p53 degradation.  
176 Overall, these results demonstrate that p53 is expressed in HPV16 immortalized cells, and that  
177 this expression may be critical for continuing proliferation of these cells. We next moved on to  
178 investigate possible reasons for the requirement of p53 expression in HFK+HPV16 cells.

### 179 **Disruption of p53 interaction with the HPV16 E2 protein attenuates cell growth and blocks** 180 **the viral life cycle**

181 A known and relatively understudied interaction of p53 with HPV16 is the direct physical  
182 interaction with E2 (43). We generated an E2 mutant predicted to not interact with p53 (E2<sup>-p53</sup>)



183 and generated stable N/Tert-1 cell lines expressing this mutant, as we have done for wild type E2  
184 (43). There was robust, stable expression of E2 and E2<sup>-p53</sup> in N/Tert-1 cells (Fig. 3A, lane 3).  
185 Immunoprecipitation with a p53 antibody brought down p53, and E2 wild type co-  
186 immunoprecipitated with p53 while E2<sup>-p53</sup> did not (Fig. 3B, compare lanes 2 and 3). To  
187 demonstrate that E2<sup>-p53</sup> was functional we carried out transcriptional studies in N/Tert-1 cells.  
188 Because the binding of p53 takes place in the DNA-binding domain (DBD) of E2, we confirmed  
189 that the mutant E2 retained DNA-binding function. Both E2 wild type and E2<sup>-p53</sup> were able to  
190 repress transcription from the HPV16 long control region (LCR) efficiently and comparatively (Fig.  
191 3C). We also measured that transcriptional activation function of E2 wild type and E2<sup>-p53</sup> (Fig. 3D).  
192 While E2<sup>-p53</sup> is able to activate transcription it was compromised when compared with E2 wild type  
193 (compare lanes 5-7 with lanes 2-4). We conclude from these experiments that E2<sup>-p53</sup> is nuclear  
194 and able to bind to its DNA target sequences but that its transcriptional activation property (but  
195 not repression) is attenuated.

196 Having confirmed that the E2<sup>-p53</sup> mutant was functional, we introduced the mutations that abrogate  
197 the E2-p53 interaction into the entire HPV16 genome (HPV16<sup>-p53</sup>). We introduced the wild type  
198 and mutant HPV16 genomes into 2 independent primary human foreskin cell populations that we  
199 recently used to investigate the role of the E2-TopBP1 interaction in the viral life cycle (53). Both  
200 the wild type and mutant genomes efficiently immortalized both HFK donor cells. We carried out  
201 Southern blotting on *SphI* cut DNA (a single cutter for the HPV16 genome) (Fig. S1A). To further  
202 characterize the status of the genomes in these cells we used TV exonuclease assays (this assay  
203 is based on the fact that episomal HPV16 genomes are resistant to exonuclease digestion) (54,  
204 55). This assay demonstrated that the viral DNA in the immortalized donor cell lines retained a  
205 predominantly episomal status, irrespective of whether the viral genomes were wild type or  
206 HPV16<sup>-p53</sup> (Fig. S1B).

207 Next, we investigated the expression of markers relevant to HPV infection in HFKs. Fig. 4A  
208 demonstrates that p53 levels are similarly reduced in HFK+HPV16 and HFK+HPV16<sup>-p53</sup> cells  
209 when compared with N/Tert-1 cells (compare lanes 2-5 with lane 1) (Fig. 4B). For comparison,  
210 cells immortalized with an E6/E7 expression vector had almost no p53 expression (lane 6), likely  
211 due to the inability of the E6 to be spliced to E6\* variants with this expression vector. To further  
212 characterize these cell lines, we investigated whether the DNA damage response is turned on as  
213 HPV infections activate both the ATR and ATM pathways. We investigated the phosphorylation  
214 status of CHK1 and CHK2 as surrogate markers for activation of these DNA damage response  
215 kinases (Fig. 4D). Compared with N/Tert-1 cells there is an overall increase of CHK1 and CHK2  
216 levels in cells immortalized with HFK+HPV16, HFK+HPV16<sup>-p53</sup> or E6/E7 expression. CHK1 and  
217 CHK2 phosphorylation is also elevated in the presence of all of the HPV16 positive cells when  
218 compared with N/Tert-1 cells. It is important to note that E6 and E7 immortalization of HFK  
219 induced phosphorylation of CHK1 but not CHK2 when compared with the entire genome (Lane  
220 6). This is likely due to the ATM pathway being largely activated by viral replication rather than by  
221 the viral oncogenes E6 and E7 which we have previously reported (56). Overall, these results  
222 suggest that markers of HPV16 infection are activated in HFK cells immortalized with HPV16  
223 irrespective of the ability of p53 to bind E2.

224 Even though the HFK+HPV16<sup>-p53</sup> cells had markers indicative of HPV16 immortalization, we  
225 noticed an aberrant growth phenotype in both foreskin donor cells (Fig. 5A). There was an initial  
226 enhanced proliferation of the HFK+HPV16<sup>-p53</sup> cells when compared with HFK+HPV16. However,  
227 around the 3-4 week mark, the HFK+HPV16<sup>-p53</sup> cells began to slow their growth and eventually  
228 stopped proliferating. To determine the mechanism of the attenuation of cell growth we  
229 investigated senescence in N/Tert-1, HFK+HPV16 and HFK+HPV16<sup>-p53</sup> cells by staining for beta-  
230 galactosidase (Fig. 5B). There was a significantly increased number of senescent cells with the  
231 p53 mutant cells and this was quantitated (Fig. 5C). Senescence can be induced by increased

232 DNA damage, particularly double strand breaks (DSB) (25, 26). Because CHK1 and CHK2  
233 pathway activation was not noticeably different between HFK+HPV16 and HFK+HPV16<sup>p53</sup>, we  
234 decided to look at DSBs more directly using single-cell gel electrophoresis (COMET assay). As  
235 expected, the expression of wild type or mutant HPV16 genomes in HFKs led to increased  
236 formation of DSBs as indicated by olive tail moment (OTM) when compared to HPV negative  
237 N/Tert-1 cells (57) (Fig. 6D). However, the mutant HFKs consistently exhibited larger OTM values  
238 compared to HFK+HPV16 (Fig. 5D and 5E). As the expression of full-length E6 from a  
239 heterologous vector attenuates the growth of HFK+HPV16 wild type cells (Fig. 2) we rationalized  
240 that expression of E6 should not alter the growth of HFK+HPV16<sup>p53</sup> cells. Stable expression of  
241 exogenous full length E6 or the E6Δp53 mutant had no additional effect on the proliferation of  
242 HFK+HPV16<sup>p53</sup> cells, illustrating that the drastic differences in proliferation are potentially due to  
243 the E2-p53 interaction (Fig. 5F).

#### 244 **HFK+HPV16<sup>p53</sup> cells have an aberrant life cycle in differentiating epithelium.**

245 We organotypically rafted HFK+HPV16 and HFK+HPV16<sup>p53</sup>. Both lines were placed on collagen  
246 plugs at early passage when the HFK+HPV16<sup>p53</sup> cells retained proliferative capacity. Due to the  
247 large difference in growth rates between the wild type and mutant cells, the original plating was  
248 performed with both  $1 \times 10^6$  and  $2 \times 10^6$  cells to promote production of a monolayer on the collagen  
249 plugs prior to lifting to the liquid-air interface for differentiation. Fig 6A demonstrates an aberrant  
250 differentiation process with the HFK+HPV16<sup>p53</sup> cells when compared with HFK+HPV16 cells at  
251 both cell densities. It is noticeable that at the lower cell density ( $1 \times 10^6$ ) there was a failure to form  
252 a monolayer prior to induction of differentiation (as evidenced by gaps between keratinocyte cell  
253 clusters on the collagen plug). Using a seeding density of  $2 \times 10^6$  eliminated the formation of gaps  
254 but did not improve the proliferation. A representative of two independent donors is shown, both  
255 donors had identical phenotypes. Fig. 6B quantitates the results from two independent rafts from  
256 two independent donors; the mutant genomes have dramatically lower raft area when compared

257 with wild-type genomes. To investigate whether differentiation has occurred in these cells we  
258 stained with Involucrin and Keratin 10 (Fig. 6C). The mutant genome cells stained positive for  
259 both differentiation markers demonstrating that, even though raft growth is markedly attenuated,  
260 differentiation still occurs. We also stained for viral replication using the DNA-damage marker  $\gamma$ -  
261 H2AX. Recently we reported that an E2 mutant that failed to interact with TopBP1 results in  
262 degradation of E2 during organotypic rafting; this degradation would block viral replication and  
263 indeed these cells had no  $\gamma$ -H2AX staining (53). This demonstrates that the  $\gamma$ -H2AX staining  
264 indicates the occurrence of viral replication. Fig. 6D demonstrates that there is abundant nuclear  
265  $\gamma$ -H2AX staining throughout HFK+HPV16 cells, indicating replication is occurring. The  
266 HFK+HPV16<sup>-p53</sup> cells also support viral replication although there is a reduction in the number of  
267 rafted cells stain positively for  $\gamma$ -H2AX (Fig. 6D).

## 268 **Discussion:**

269 The HPV E2 protein is essential for viral genome replication, segregation of viral episomes into  
270 daughter cells following cell division, and can transcriptionally regulate both virus and host  
271 genomes (12, 19, 20). E2 interacts with a variety of host factors to promote progression of the  
272 viral life cycle, many of which are essential such as interactions with TopBP1 and BRD4 (12, 19,  
273 23, 53, 58). In this report, we propose that E2 binding to p53 is also an essential interaction as  
274 abrogation of the interaction leads to catastrophic failure of the viral life cycle.

275 In the classical high-risk HPV model, upon initial infection, the viral oncogenes E6 and E7 inhibit  
276 and degrade tumor suppressor proteins p53 and pRb respectively, promoting hyperproliferation,  
277 unregulated DNA replication, mutation accumulation and potentially eventual carcinogenesis.  
278 Therefore, immortalization of cell lines can be achieved with overexpression vectors of E6 and  
279 E7 (Fig. 1A, Lanes 4 and 8). Previous studies suggest that E6 splice variants and their action on  
280 E6-E6AP-p53 complex disruption is cell-cycle dependent (38). In HPV18 cell lines, E6\*1 shows  
281 marked upregulation during and p53 restoration during G2/M (38). We have previously illustrated

282 that E2 is stabilized during mitosis which is important for its association with TopBP1 and its role  
283 as a segregation factor (53). It is entirely possible that the cell-cycle mediated p53 restoration  
284 corresponds with E2 stabilization allowing these proteins to interact, and may also play an  
285 important role in genome segregation.

286 E2 can regulate host transcription in a multitude of ways. We recently reported that E2 can  
287 epigenetically repress the TWIST1 at the histone level, inhibiting EMT and promoting a less  
288 aggressive cellular phenotype (20). E2 can also promote the recruitment of DNA  
289 methyltransferase 1 to interferon response genes, resulting in DNA base methylation and global  
290 innate immunity downregulation (21). It is currently unclear how E2 recruits epigenetic modifiers  
291 to these genes and p53 may play an important role. DNA methyltransferases (DNMTs) are often  
292 part of large multimeric complexes and use transcription regulatory proteins to help target specific  
293 genes undergoing epigenetic silencing (59, 60). p53 is known to also interact with DNMT1  
294 resulting in the methylation of antiapoptotic genes (61). It is possible that the interaction between  
295 E2 and p53 is important for the rerouting of DNMTs to different genes whose regulation is  
296 important for a healthy viral life cycle. It is also noticeable that E2-p53 has an attenuated ability to  
297 activate transcription (Fig. 3), indicating that regulation of host gene transcription by E2 may  
298 require co-operation with p53 in some cases.

299 The results from Fig. 5D suggest that additional double strand breaks play a role in the enhanced  
300 damage and proliferation rate of HFK+HPV16-p53 mutant cells compared to wild type  
301 immortalized HFKs. HPV uses homologous recombination (HR) factors to assist in viral replication  
302 (62-64). Conversely, p53 binds to replication protein A (rpA) resulting in repression of HR,  
303 reducing DSB repair and promoting apoptosis during catastrophic genome instability (27, 29). It  
304 is possible that E2 helps regulate this activity of p53 and inability to do so results in accumulation  
305 of DSBs as seen in Fig. 5D.

306 In conclusion, this report indicates that p53 expression is retained in HPV16 positive cell lines and  
307 tumor samples under a variety of conditions. Depletion of this residual p53 by full length E6 results  
308 in significant reduction in proliferation and enhanced senescence in cells immortalized with  
309 HPV16 which we attribute to loss of E2 interaction with p53. Human foreskin cells immortalized  
310 by HPV16 where E2 can no longer bind to p53 exhibit aberrant phenotypes including dysregulated  
311 proliferation, enhanced levels of DSBs and overall failure of the viral life cycle during organotypic  
312 raft culturing. Due to the importance of p53 in the context of HPV related cancers as well as the  
313 profound phenotypes demonstrated in this report, further investigation on the interaction between  
314 E2 and p53 is warranted.

315

#### 316 **Methods:**

317 **Cell culture.** N/Tert-1 cells and head-and-neck cancer lines UMSCC47 and UMSCC104 were  
318 cultured as previously described (20, 21, 65-67). Immortalization and culturing of human foreskin  
319 keratinocytes with HPV16 are described below. Cells were incubated at 37°C and 5% CO<sub>2</sub> with  
320 media changed every 3 days. For cisplatin treatment, cells were incubated with indicated  
321 concentrations of drug dissolved in DMF or DMF vehicle control for 24-hours

322 **Immortalization of human foreskin keratinocytes (HFK).** HPV16 mutant genome (HPV16-p53,  
323 which contained an E2 unable to bind p53) was generated and sequenced by Genscript (42, 44,  
324 68). Residues Aspartic acid 388, Tryptophan 341 and Aspartic acid 344 were all mutated to  
325 alanine resulting in inability for E2 to interact with p53. The HPV16 genome was removed from  
326 the parental plasmid using *SphI*, and the viral genomes isolated and then re-circularized using T4  
327 ligase (NEB) and transfected into early passage HFK from three donor backgrounds (Lifeline  
328 technology), alongside a G418 resistance plasmid, pcDNA. Cells underwent selection in 200  
329 µg/mL G418 (Sigma-Aldrich) for 14 days and were cultured on a layer of J2 3T3 fibroblast feeders

330 (NIH), which had been pre-treated with 8 µg/ml mitomycin C (Roche). Throughout the  
331 immortalization process, HFK were cultured in Dermalife-K complete media (Lifeline Technology).

332 **Western blotting.** Protein from cell pellets was extracted with 2x pellet volume protein lysis buffer  
333 (0.5% Nonidet P-40, 50mM Tris [pH 7.8], and 150mM NaCl) supplemented with protease inhibitor  
334 (Roche Molecular Biochemicals) and phosphatase inhibitor cocktail (Sigma). Protein extraction  
335 from patient derived xenografts was performed as previously described.(45, 46) The cells were  
336 lysed on ice for 30 min followed by centrifugation at 18,000 rcf (relative centrifugal force) for 20  
337 min at 4°C. Protein concentration was estimated colorimetrically using a Bio-Rad protein assay  
338 and 25 µg of protein with equal volume of 2X Laemmli sample buffer (Bio-Rad) was denatured at  
339 70°C for 10 min. The samples were run on a Novex™ WedgeWell™ 4 to 12% Tris-glycine gel  
340 (Invitrogen) and transferred onto a nitrocellulose membrane (Bio-Rad) using the wet-blot method,  
341 at 30 V overnight. The membrane was blocked with *Li-Cor* Odyssey® blocking buffer (PBS)  
342 diluted 1:1 v/v with PBS for 1 hour at room temperature and then incubated with specified primary  
343 antibody in *Li-Cor* Odyssey® blocking buffer (PBS) diluted 1:1 with PBS. Afterwards, the  
344 membrane was washed with PBS supplemented with 0.1% Tween20 and further probed with the  
345 Odyssey secondary antibodies (IRDye® 680RD Goat anti-Rabbit IgG (H + L), 0.1 mg or IRDye®  
346 800CW Goat anti-Mouse IgG (H + L), 0.1 mg) in *Li-Cor* Odyssey® blocking buffer (PBS) diluted  
347 1:1 with PBS at 1:10,000 for 1 hour at room temperature where applicable. After washing with  
348 PBS-tween, the membrane was imaged using the Odyssey® CLx Imaging System and ImageJ  
349 was used for quantification. Primary antibodies used for western blotting studies are as follows:

350 p53, 1:1000 (Santa Cruz; cat. no. sc-47698) HPV16 E2, 1:1000 (TVG261) (Abcam; cat. no.  
351 ab17185) phospho-CHK1, 1:1000 (Ser345) (Cell Signaling; cat. No. 2341S), phosphor CHK2  
352 (Thr68), 1:1000 (Cell Signaling; cat. No. 2661S), CHK1, 1:1000(Cell Signaling; cat. No. 2360),  
353 CHK2, 1:1000 (Abcam; cat. No. ab47443), GAPDH, 1:250 (Santa Cruz; cat. no. sc-47724).



354 **Plasmids.** The following plasmids were used the completion of these studies: pMSCV-N-FLAG-  
355 HA-GFP, pMSCV-N-FLAG-HA-HPV16E6, pMSCV-IP-N-FLAG-HA-16E6 8S9A10T (“E6Δp53”).  
356 Wild-type 16E2 or 16E2-p53 (Mutated residues W341A, D344A, D338A) were cloned into pCDNA  
357 vector for confirmation of p53 interaction in N/Tert-1 cells. pCDNA was used for empty vector  
358 control.

359 **Real-time qPCR.** RNA was isolated using the SV Total RNA isolation system (Promega)  
360 according to manufacturer’s instructions. 2 μg of RNA was reverse transcribed into cDNA using  
361 the high-capacity reverse transcription kit (Applied Biosystems). The PowerUp SYBR green  
362 master mix (Applied Biosystems) was used along with cDNA and gene specific primers and real-  
363 time PCR was performed using a 7500 Fast real-time PCR system as previously described. (20,  
364 21, 65) Expression was quantified as relative quantity over GAPDH using the  $2^{-\Delta\Delta C_T}$  method.  
365 Primers used are as follows. FLAG-HA Tag fwd 5'- GACTACAAGGATGACGATG- 3', FLAG-HA  
366 Tag rev 5'- GCGTAATCTGGAACATCG -3'.

367 **p53 Immunoprecipitation.** Primary polyclonal antibody against p53 (Invitrogen; PA5-27822) or  
368 a HA-tag antibody (used as a negative control) was incubated in 200 μg of cell lysate (prepared  
369 as described above), made up to a total volume of 500 μl with lysis buffer (0.5% Nonidet P-40,  
370 50mM Tris [pH 7.8], and 150mM NaCl), supplemented with protease inhibitor (Roche Molecular  
371 Biochemicals) and phosphatase inhibitor cocktail (Sigma) and rotated at 4°C overnight. The  
372 following day, 50 μl of pre-washed protein A-sepharose beads per sample was added to the  
373 lysate/antibody solution and rotated for 4 hours at 4°C. The samples were gently washed with  
374 500 μl lysis buffer by centrifugation at 1,000 rcf for 2-3 min. This wash was repeated 4 times. The  
375 bead pellet was resuspended in 4X Laemmli sample buffer (Bio-Rad), heat denatured and  
376 centrifuged at 1,000 rcf for 2-3 min. Proteins were separated using an SDS-PAGE system and  
377 transferred onto a nitrocellulose membrane before probing for the presence of E2 or p53, as per  
378 western blotting protocol.



379 **Transcription and LCR Repression assays.** A pTK6E2-Luciferase reporter plasmid was  
380 utilized to analyze transcriptional activation of Wild-type HPV16 E2 and E2 $\Delta$ p53 proteins as  
381 previously described (23).  $5 \times 10^5$  N/Tert-1 cells were seeded onto 100mm<sup>2</sup> plate and transfected  
382 24 hours later with 0 ng, 10 ng, 100 ng or 1000 ng of E2 WT or E2-p<sup>53</sup> plasmid DNA along with  
383 1000ng of pTK6E2-Luciferase reporter plasmid using Lipofectamine 2000 according to the  
384 manufacturer's instructions (ThermoFisher Scientific). Cells were harvested the next day using  
385 Promega luciferase assay system. For LCR repression activity, a pHPV16-LCR-Luciferase  
386 reporter was used in place of the pTK6E2-Luciferase plasmid.(65)

387 **Southern blotting.** Total cellular DNA was extracted by proteinase K-sodium dodecyl sulfate  
388 digestion followed by a phenol-chloroform extraction method. 5  $\mu$ g of total cellular DNA was  
389 digested with either SphI (to linearize the HPV16 genome) or HindIII (which fails to cut HPV16  
390 genome). All digestions included DpnI to ensure that all input DNA was digested. All restriction  
391 enzymes were purchased from NEB and utilized as per manufacturer's instructions. Digested  
392 DNA was separated by electrophoresis of a 0.8% agarose gel, transferred to a nitrocellulose  
393 membrane, and probed with radiolabeled (32-P) HPV16 genome as previously described.(67)  
394 This was then visualized by exposure to film for 1 to 24 hours. Images were captured from an  
395 overnight-exposed phosphor screen by GE Typhoon 9410 and quantified using ImageJ.

396 **Exonuclease V assay.** PCR based analysis of viral genome status was performed using methods  
397 described by Myers et al (2019). Briefly, 20 ng genomic DNA was either treated with exonuclease  
398 V (RecBCD, NEB), in a total volume of 30  $\mu$ l, or left untreated for 1 hour at 37°C followed by heat  
399 inactivation at 95°C for 10 minutes. 2 ng of digested/undigested DNA was then quantified by real  
400 time PCR using a 7500 FAST Applied Biosystems thermocycler with SYBR Green PCR Master  
401 Mix (Applied Biosystems) and 100 nM of primer in a 20  $\mu$ l reaction. Nuclease free water was used  
402 in place of the template for a negative control. The following cycling conditions were used: 50°C  
403 for 2 minutes, 95°C for 10 minutes, 40 cycles at 95°C for 15 seconds, and a dissociation stage of

404 95°C for 15 seconds, 60°C for 1 minute, 95°C for 15 seconds, and 60°C for 15 seconds. Separate  
405 PCR reactions were performed to amplify HPV16 E6 F: 5'- TTGCTTTTCGGGATTTATGC-3' R:  
406 5'- CAGGACACAGTGGCTTTTGA-3', HPV16 E2 F: 5'- TGGAAGTGCAGTTTGATGGA-3' R: 5'-  
407 CCGCATGAACTTCCCATACT-3', human mitochondrial DNA F: 5'-  
408 CAGGAGTAGGAGAGAGGGAGGTAAG-3' R: 5'-TACCCATCATAATCGGAGGCTTTGG -3', and  
409 human GAPDH DNA F: 5'- GGAGCGAGATCCCTCCAAAAT-3' R: 5'-  
410 GGCTGTTGTCATACTTCTCATGG-3'

411 **Senescence Staining.**  $7.5 \times 10^4$  cells were seeded in 6-well plates. The following day, cells were  
412 stained for senescence using the Cell Signal Senescence  $\beta$ -Galactosidase Staining kit according  
413 to manufacturer's instructions (9860). Randomly selected images were taken using the Keyence  
414 imaging system at 10X. Positively stained cells were counted by a blinded observer and average  
415 number of positively stained cells per field were calculated.

416 **Single-cell gel electrophoresis (COMET) Assay.**  $1 \times 10^4$  cells were plated in 24-well plate with  
417 1mL media one day prior to harvest. The next day, cells were trypsinized and resuspended in a  
418 mixture 0.5% w/v Low molecular weight agarose (Lonza, cat. No. #50101) and PBS at a ratio of  
419 10:1. Suspension was immediately pipetted onto Trivegen COMET Slides™ (4250-004-03) and  
420 allowed to dry for 30 min at 4°C. Slides underwent lysis for 90 min at 4°C in the dark (Lysis buffer:  
421 10mM Tris, 100mM EDTA, 2.5M NaCl, 1% TritonX100, 10%DMSO titrated to pH 10.0).  
422 Afterwards slides were placed in Alkaline buffer for 25 min at at 4°C in the dark (Alkaline buffer:  
423 1mM EDTA, 200mM NaOH, pH >13.0). Slides were transferred to an agarose gel electrophoresis  
424 box filled with additional alkaline buffer. Electrophoresis was performed at 25V for 20min at room  
425 temperature in the dark. Slides were then washed 2x in dd (double distilled) H<sub>2</sub>O for 5 min at RT  
426 and then placed in neutralization buffer for 20min at RT in dark (Neutralization buffer: 400mM  
427 Tris-HCl titrated to pH 7.5). Neutralized slides were then left to dry at 37°C in the dark. Dried  
428 slides were stained with DAPI (1:10,000 in dd H<sub>2</sub>O) for 15 min at RT then washed 2x with dd H<sub>2</sub>O  
429 for 5 min. Stained and rinsed slides were left to dry overnight. Slides were imaged using the

430 Keyence imaging system at 20x with >5 images taken per replicate. Quantization of olive tail  
431 moments (OTM) was achieved using the CASPLab COMET Assay imaging software by Końca K  
432 et al, 2003 (69).

433

434 **Organotypic raft culture.** Keratinocytes were differentiated via organotypic raft culture as  
435 described previously.(21, 67, 70) Briefly, cells were seeded onto type 1 collagen matrices  
436 containing J2 3T3 fibroblast feeder cells. Cells were cultured to confluency atop the collagen  
437 plugs, lifted onto wire grids and cultured in cell culture dishes at the air-liquid interface. Media was  
438 replaced on alternating days. Following 14 days of culture, rafted samples were fixed with  
439 formaldehyde (4% v/v) and embedded in paraffin. Multiple 4µm sections were cut from each  
440 sample. Sections were stained with hematoxylin and eosin (H&E) and others prepared for  
441 immunofluorescent staining via HIER. Fixing and embedding services in support of the research  
442 project were generated by the VCU Massey Cancer Center Cancer Mouse Model Shared  
443 Resource, supported, in part, with funding from NIH-NCI Cancer Center Support Grant P30  
444 CA016059. Fixed sections were antigen retrieved in citrate buffer, and probed with the following  
445 antibodies for immunofluorescent analysis: phospho-γH2AX 1/500 (Cell Signaling Technology;  
446 9718), Involucrin 1/1000 (abcam; ab27495), Keratin 10 1/1000 (SigmaAldrich; SAB4501656), and  
447 HPV16 E2. (monoclonal B9)(71) Cellular DNA was stained with 4',6-diamidino-2-phenylindole  
448 (DAPI, Santa Cruz sc-3598). Microscopy was performed using the Keyence imaging system,

449

450

451

452

453

454 **Acknowledgements:**

455 This work was supported by VCU Philips Institute for Oral Health Research and the National  
456 Cancer Institute designated Massey Cancer Center grant P30 CA016059 (IMM). DB is supported  
457 by R01DE027185, a grant from the National Institute of Dental and Craniofacial Research.

458

459

460

461

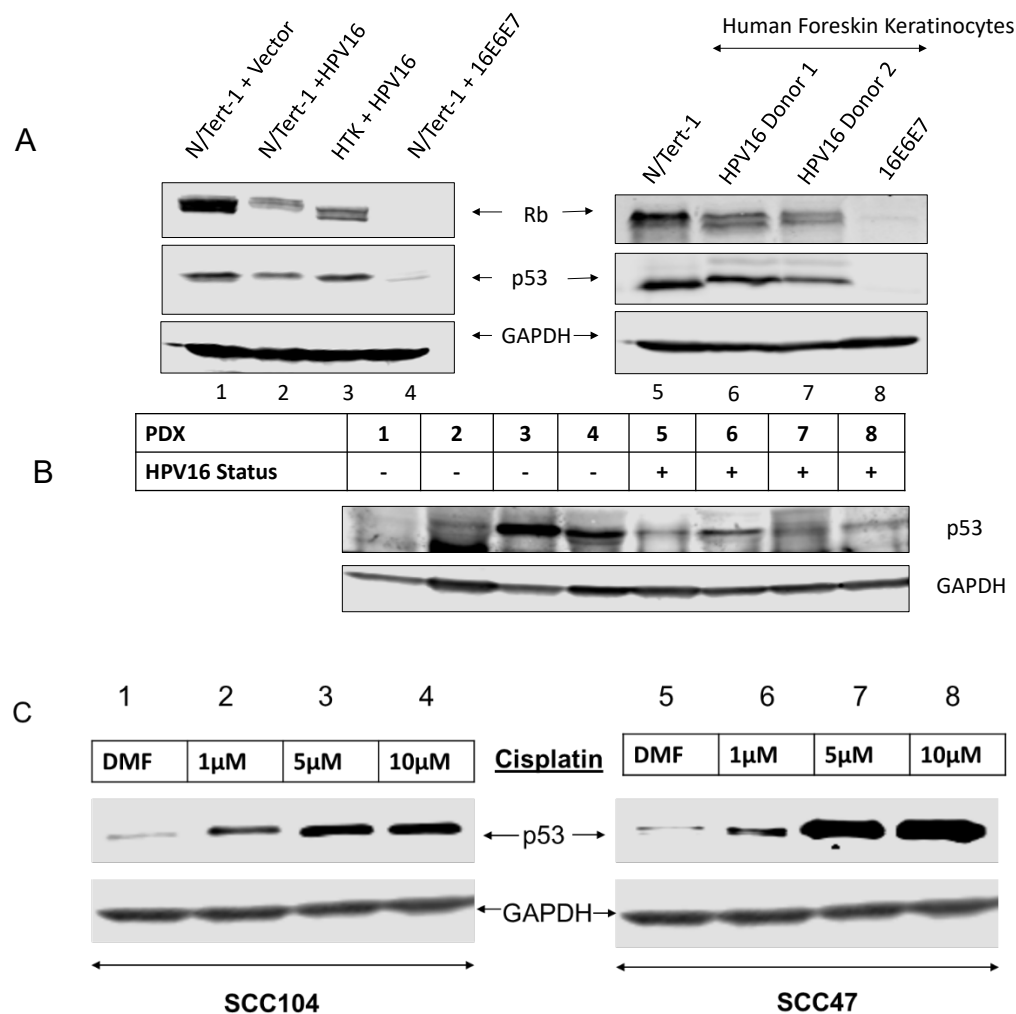

464 **Figure 1. Tumor suppressor p53 expression is conserved in HPV16 immortalized cell lines**  
 465 **and patient derived xenografts** (A) Western blot analysis of p53 and pRb in N/tert-1 cells stably  
 466 expressing the HPV16 genome (lane 2), HPV16 E6+E7 (lane 4) or empty vector (lane 1)  
 467 compared to Human tonsillar keratinocytes immortalized with HPV16 (lane 3). Two independent  
 468 human foreskin keratinocyte (HFK) donors were immortalized with wild-type HPV16 (lanes 6 and  
 469 7) or overexpression of HPV16 E6 and E7 oncogenes (lane 8, cells from donor 1). (B) Western  
 470 blot analysis of p53 expression in 4 HPV-negative and 4 HPV-positive patient derived xenografts.  
 471 (C). p53 expression following 24-hour cisplatin treatment of primary HPV-positive head and neck

472 cancer cell lines (SCC47 and SCC104) DMF solvent only was used as drug-free control. All  
 473 western blots utilized GAPDH as an internal loading control.

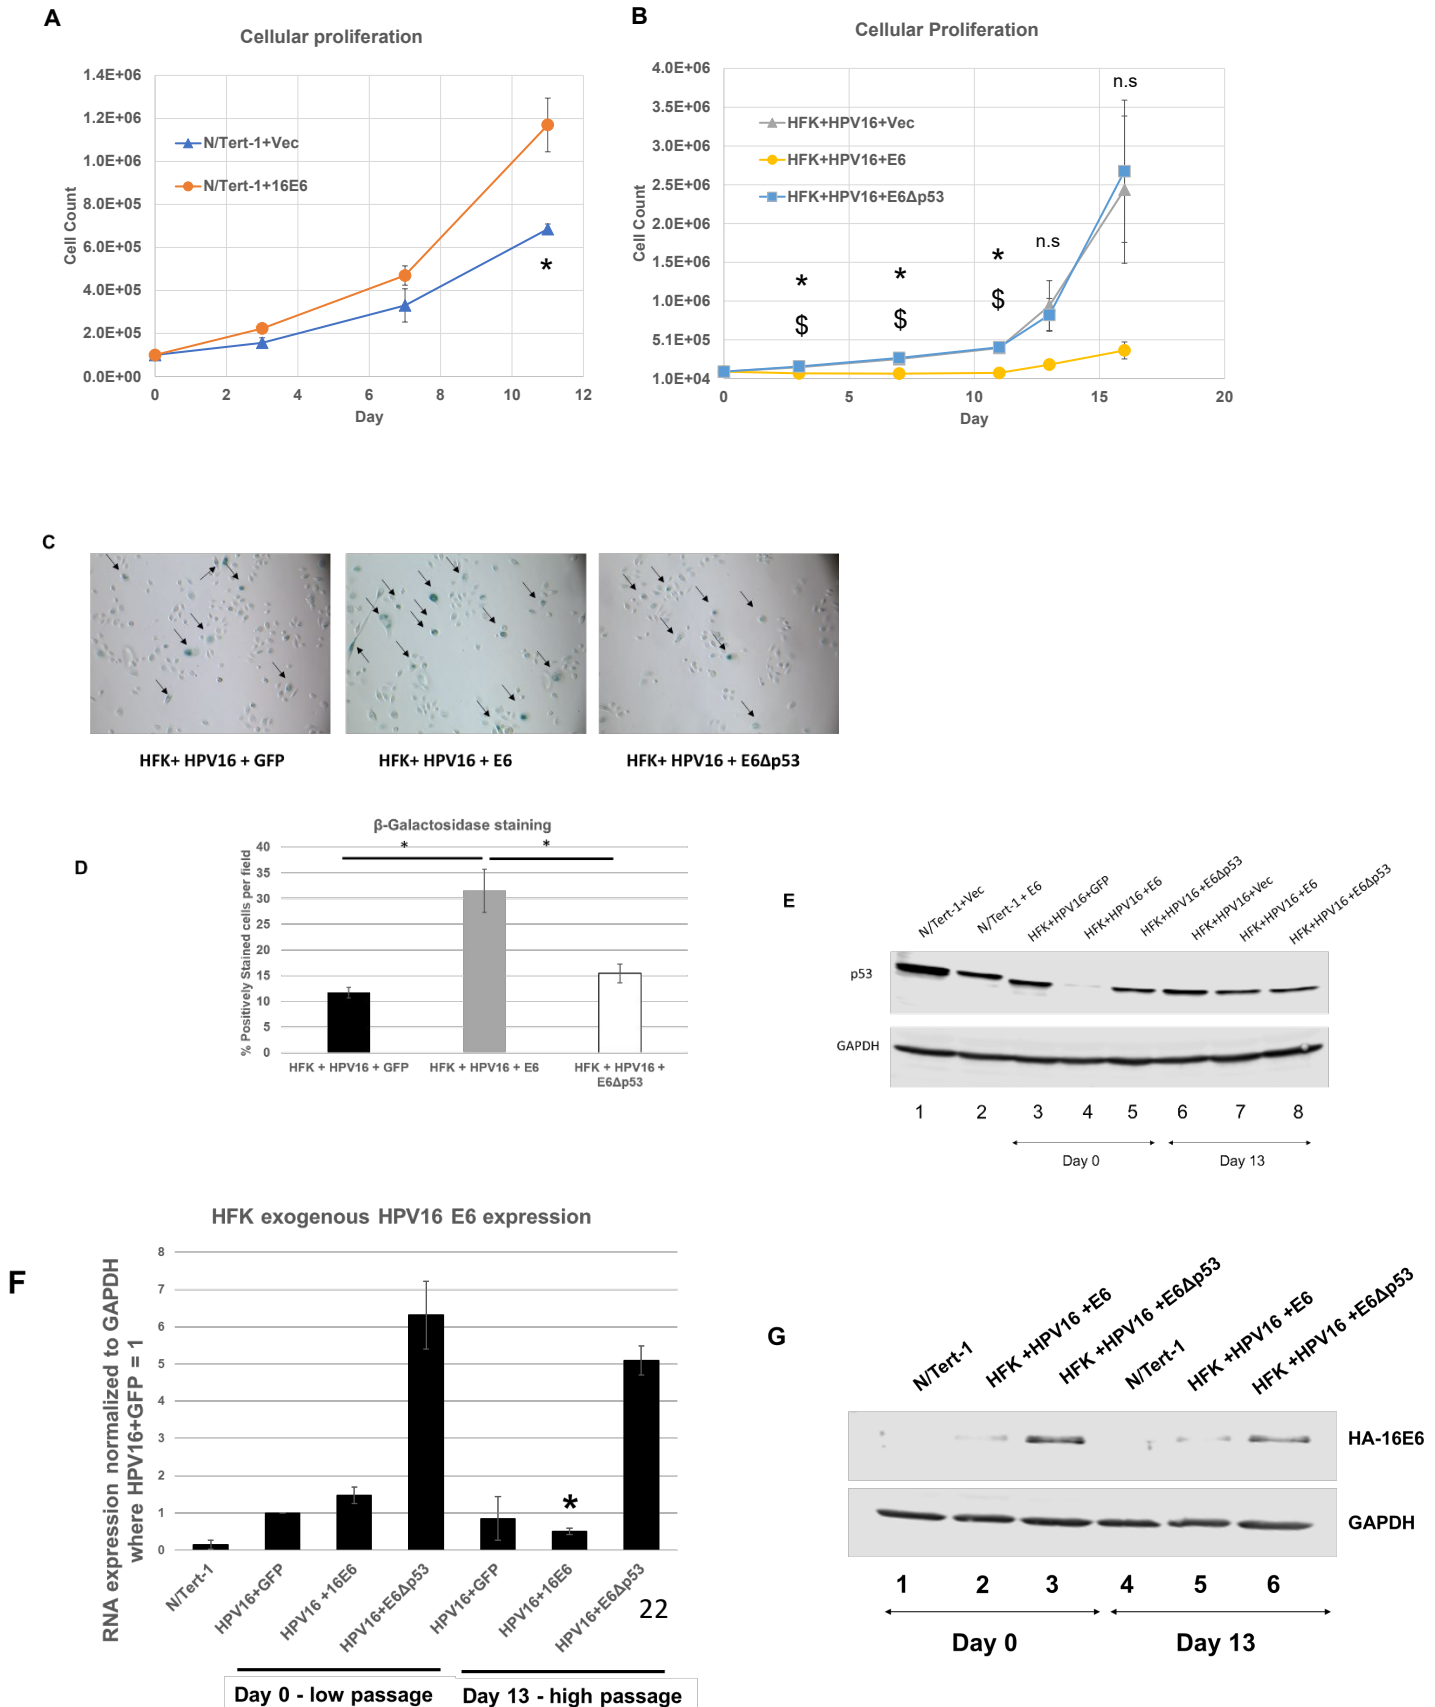

478 **Figure 2. p53 reduction in via introduction of full length HPV16 E6 reduces cellular**  
479 **proliferation in HPV16 immortalized foreskin keratinocytes.** (A) 11-day growth curve of  
480 N/Tert-1 cells expressing exogenous HPV16 E6 compared to empty vector. (B) 13-day growth  
481 curve of human foreskin keratinocytes immortalized by HPV16 and stably expressing  
482 exogenous full length E6, mutant E6 that does not bind and degrade p53 (E6 $\Delta$ p53) or GFP  
483 control vector. (C) Senescence staining of cells in B at day 11. Arrows indicate positively  
484 staining cells. (D) Quantification of senescence staining in C. Western blot analysis of p53  
485 expression following transfection of E6 plasmids (day 0) and after growth rate recovery of  
486 HFK+HPV16+E6 (day 13). (E) Western blot analysis of exogenous E6 and E6 $\Delta$ p53 expression  
487 at day 0 and day 13 using primary antibody against HA tag. HFK+GFP samples were omitted  
488 due to signal oversaturation and bleed over into neighboring wells. GAPDH was used as  
489 internal loading control. (F) RT-qPCR analysis of exogenous GFP, E6 and E6 $\Delta$ p53 expression  
490 at day 0 and day 13 using primers against FLAG-HA tag. Relative quantity calculated by the  
491  $\Delta\Delta C_T$  method using GAPDH as an internal control. Bonferroni correction utilized when  
492 applicable. (G) Western blotting of the indicated extracts using FLAG antibody (the E6 is double  
493 tagged with HA and FLAG).

494

495

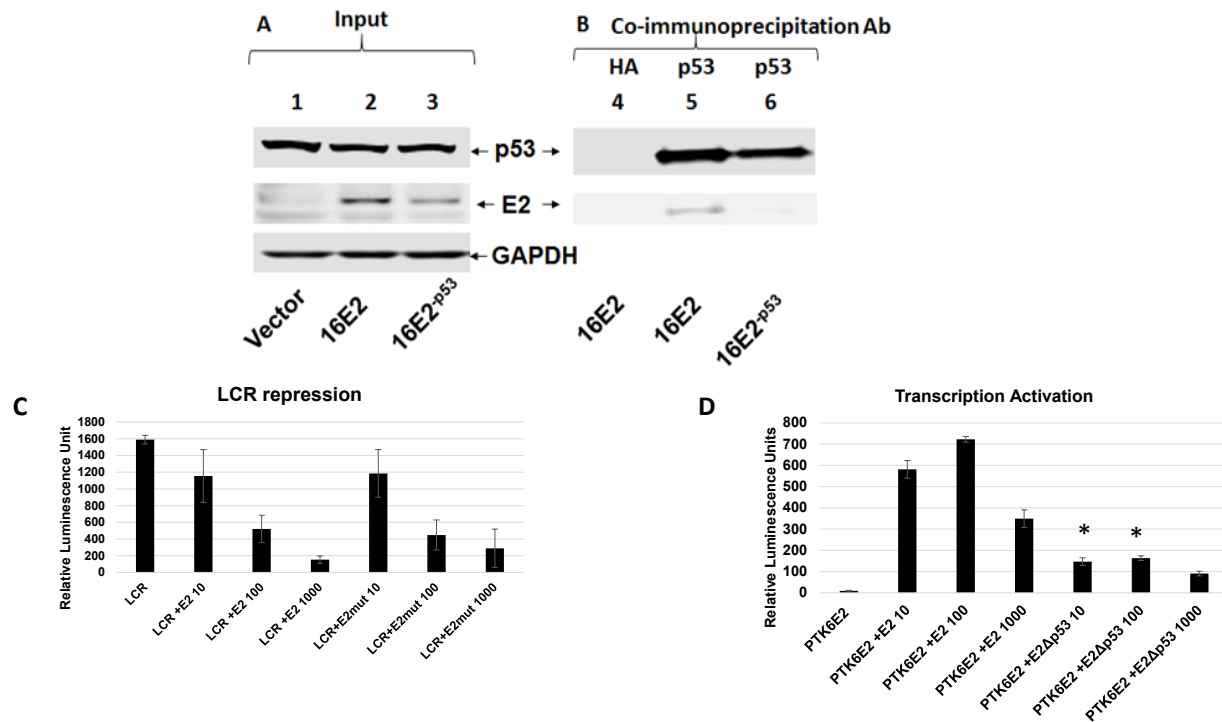

496

497 **Figure 3. Generation and characterization of p53 binding mutant of HPV16 E2 (E2-p53) in**  
 498 **N/Tert-1 cells.** (A) Input western blot of stably expressing E2 and E2<sup>p53</sup> in N/Tert-1 Cells. For E2<sup>p53</sup>,  
 499 residues W341, D344 and D338 were mutated to alanine as previously described (42, 43).  
 500 (B) Co-immunoprecipitation pull down of E2 using polyclonal antibody against p53. (C) HPV16  
 501 long control region repression assay of wild-type E2 and E2<sup>p53</sup>. N/Tert-1 cells were transiently  
 502 transfected with 1 µg pHPV16-LCR-Luciferase reporter plasmid along with 10ng, 100ng, or  
 503 1000ng of E2 or E2-p53 plasmid. (D) E2 transcriptional activity assay of wild-type E2 and E2-p53.  
 504 Similar to LCR repression assay, N/Tert-1 cells were transiently transfected with 1 µg pTK6E2-  
 505 Luciferase reporter plasmid along with increasing amounts of E2 wild-type and E2-p53 plasmids.  
 506 For (C) and (D), relative luminescence units were calculated by normalizing absolute  
 507 luminescence readouts to input protein concentration.

508

509



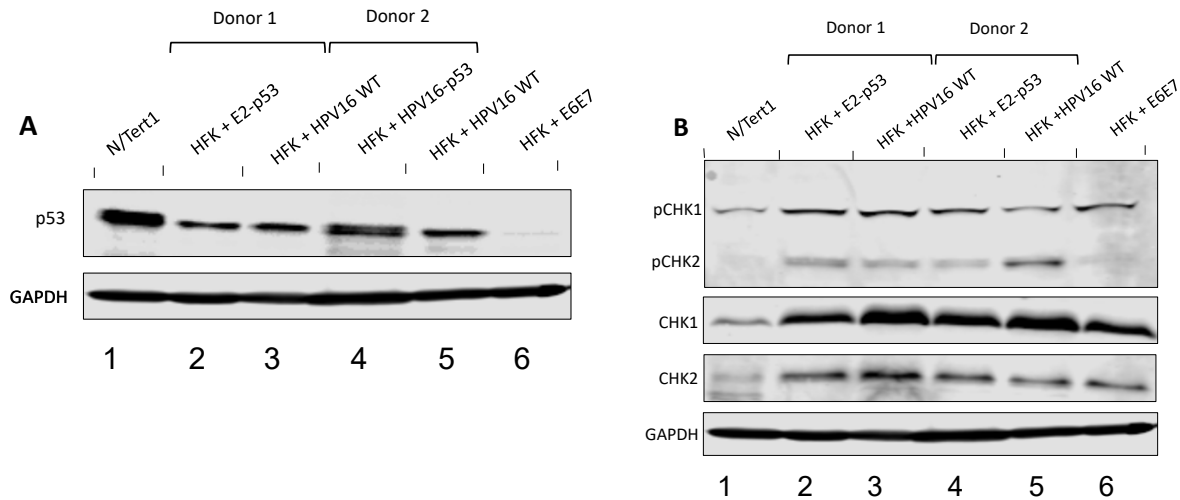

510

511

512

513 **Figure 4. Generation and characterization of HPV16-p53 immortalized human foreskin**

514 **keratinocytes (HFKs).** (A) p53 protein expression in two independent HFK donors immortalized

515 by wild-type HPV16 (Lanes 3 and 5) and HPV-p53 (Lanes 2 and 4). N/Tert-1 and HFK

516 immortalized by E6 and E7 are provided for reference (lanes 1 and 6 respectively). (B) Activation

517 of the ATR and ATM DNA-damage pathways in immortalized HFKs. ATR and ATM activation by

518 HPV16 leads to phosphorylation of Checkpoint kinases 1 and 2 respectively and serve as markers

519 for HPV infection and replication.

520

521

A

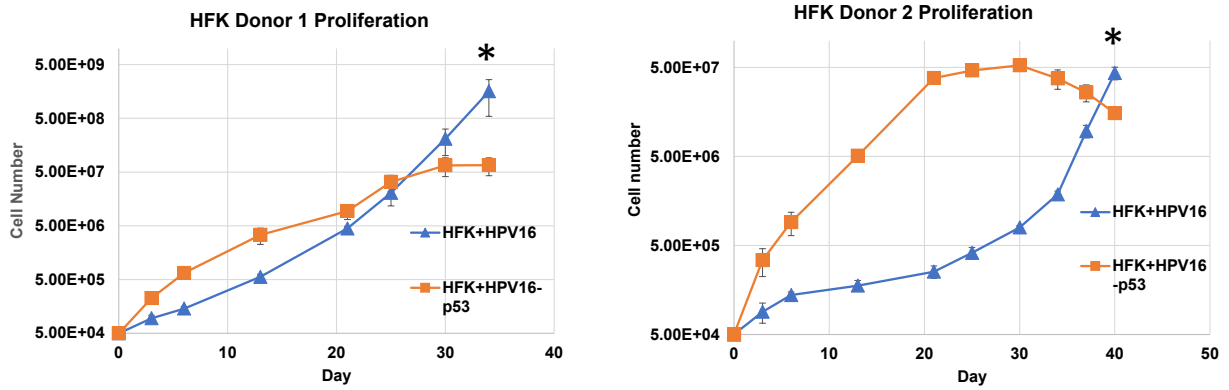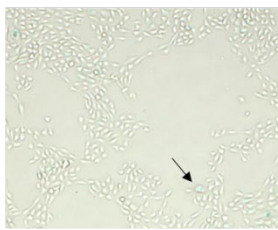

N/Tert-1

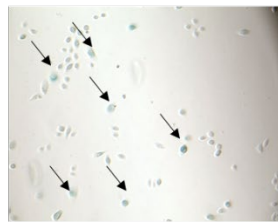

HFK + HPV16

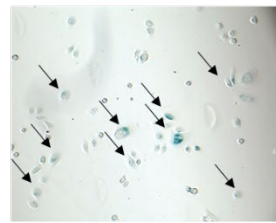

HFK + HPV16-p53

C

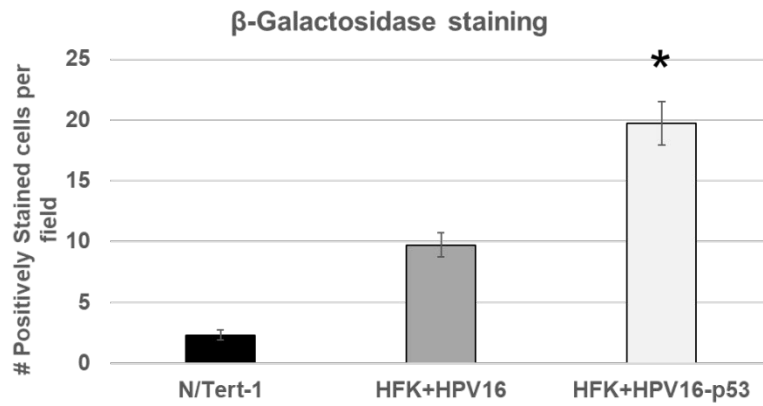

522

523

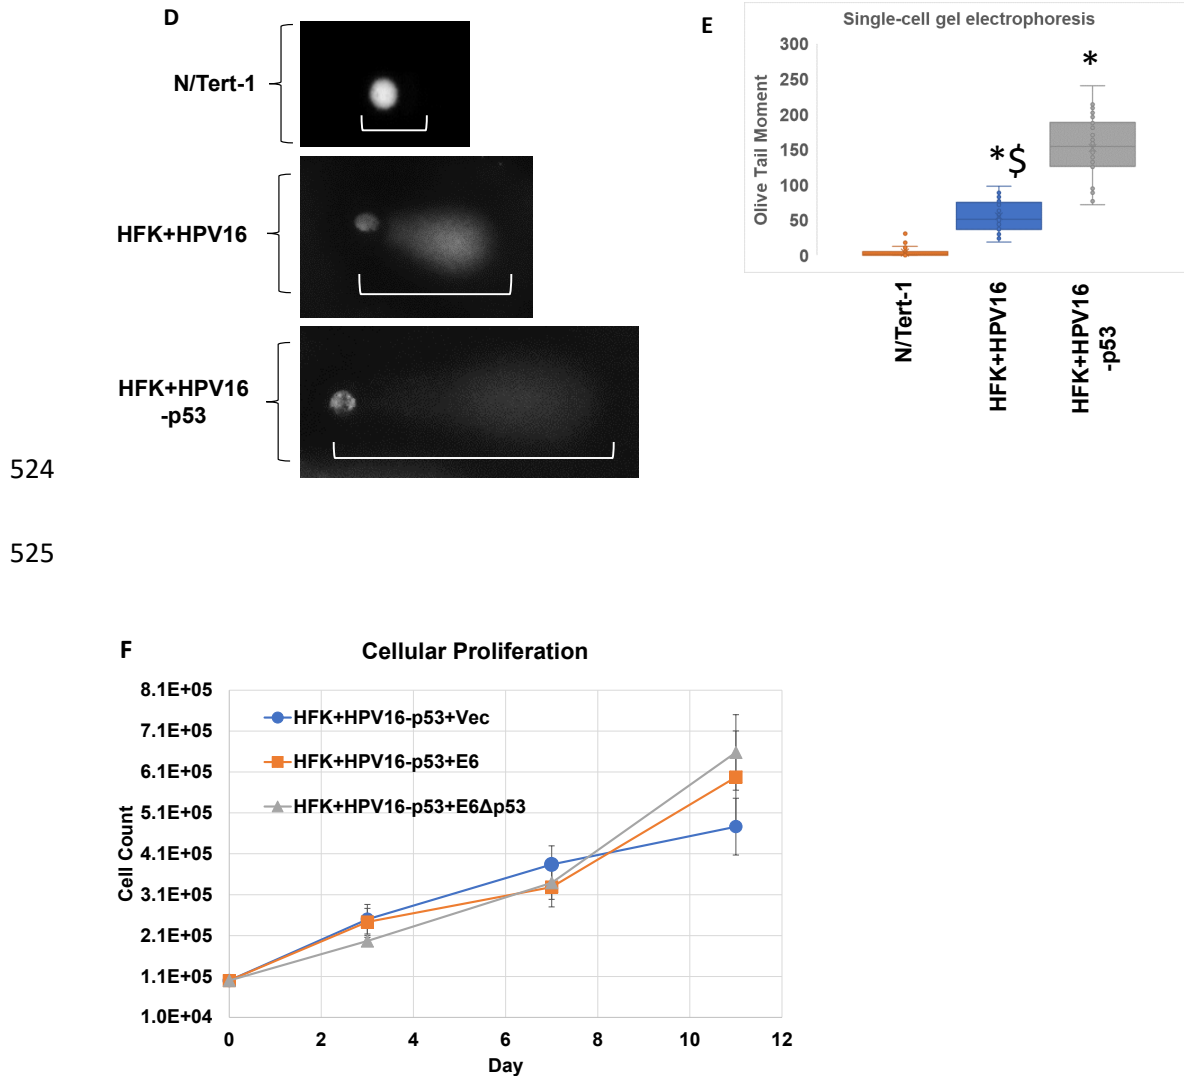

527 **Figure 5. HFKs immortalized by HPV16-p53 exhibit aberrant growth phenotype, elevated**  
 528 **levels of senescence and increased DNA damage and fragmentation.** (A) Extended growth  
 529 curve on HFK's immortalized by wild-type HPV16 and HPV16-p53. Cells were grown over a  
 530 period of 34-40 days depending on HFK donor cell line. In general, donor 1 proliferated quicker  
 531 than donor 2 regardless of HPV genome status. (B).  $\beta$ -galactosidase staining as a marker of  
 532 senescence for proliferating HFK+HPV16 and HFK+HPV16-p53 cells compared to N/Tert-1 cells.  
 533 Images taken at 10X. Five random fields were imaged per replicate per cell line. Representative  
 534 image presented with positively stained cells marked by arrows. (C) Quantification of  $\beta$ -

535 galactosidase staining. Average number of positively stained cells per high power field were  
536 calculated by a blinded observer +/- SEM. (D) Single-cell gel electrophoresis (COMET) Assay.  
537 Cells were grown in 24-well plate for 24 hours then trypsinized, washed, resuspended in 0.5%  
538 low molecular weight agarose, and subjected to single cell gel electrophoresis. DNA was stained  
539 with DAPI. Five randomly selected fields were imaged at 20x per replicate per cell line.  
540 Representative comets are presented with white bars highlighting comet tails. (E) The olive-tail  
541 moments (OTMs) of all non-overlapping comets in each high-power field were were quantified  
542 using CaspLab COMET assay software. Average OTM +/- SEM. \*p<0.05 for HFK+HPV16 vs  
543 HFK+HPV16-p53. \$p<0.05 for HFK+HPV16 vs N/Tert-1. Bonferoni correction used where  
544 applicable. (F). Eleven-day growth curve on HFK+HPV16-p53 stably expressing exogenous E6,  
545 E6Δp53 or GFP control.

546

547

548

549

550

551

552

553

554

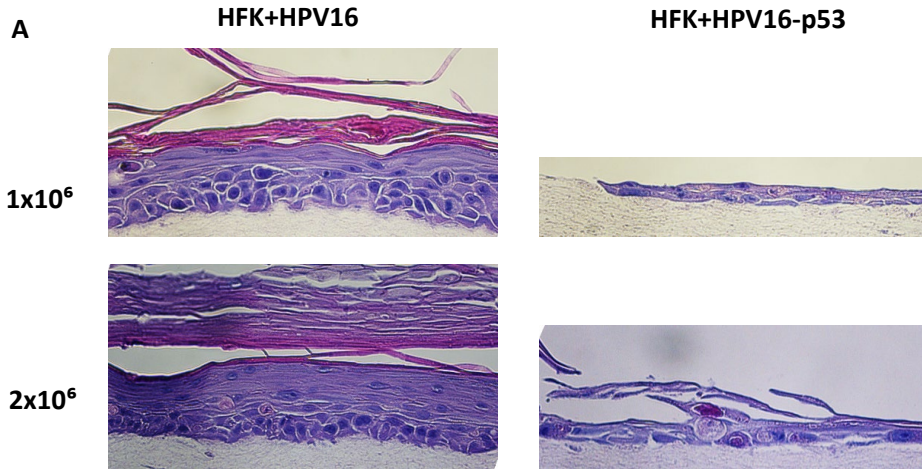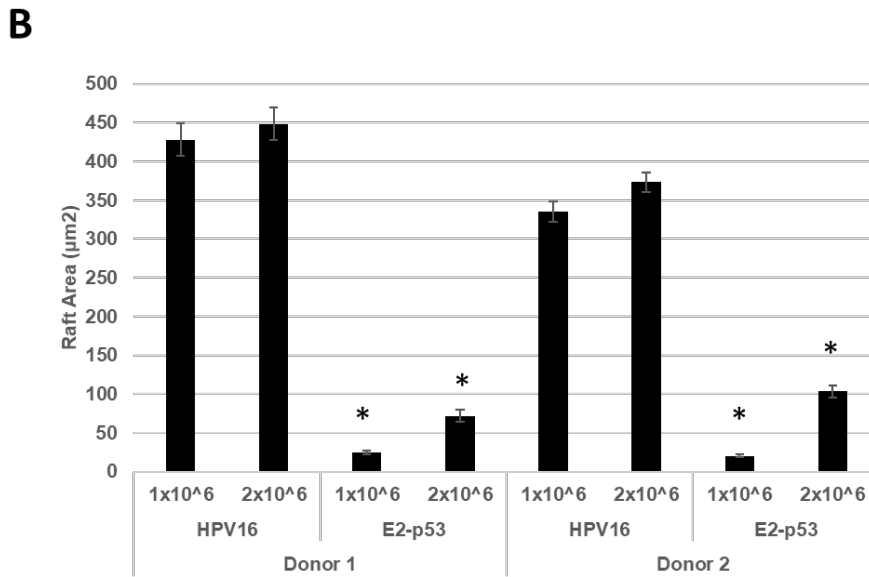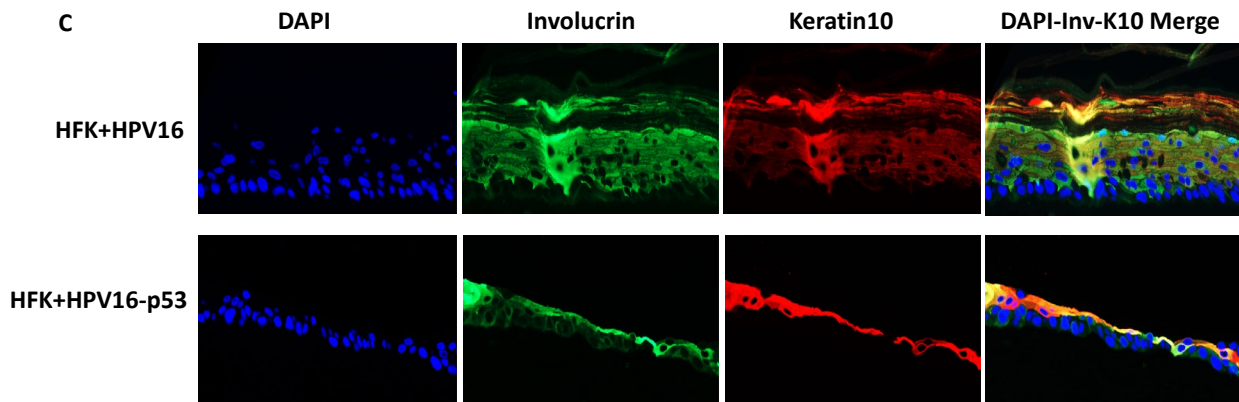

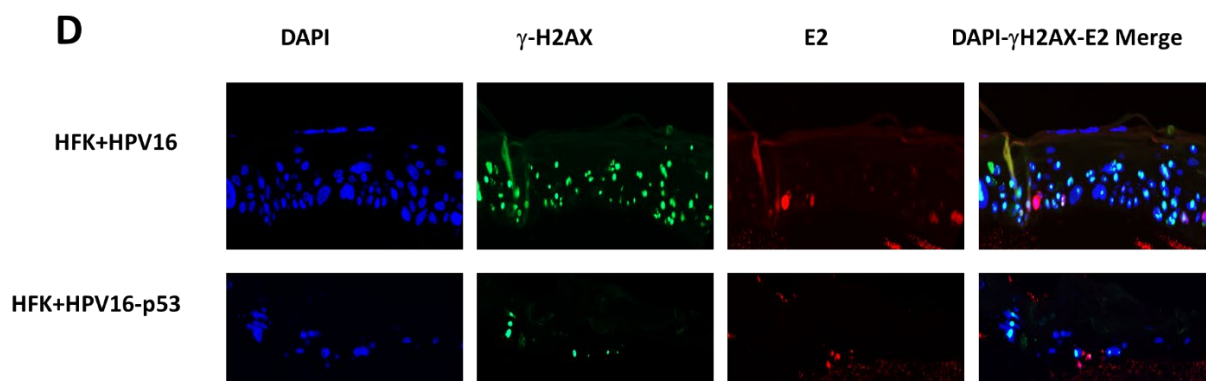

**E**

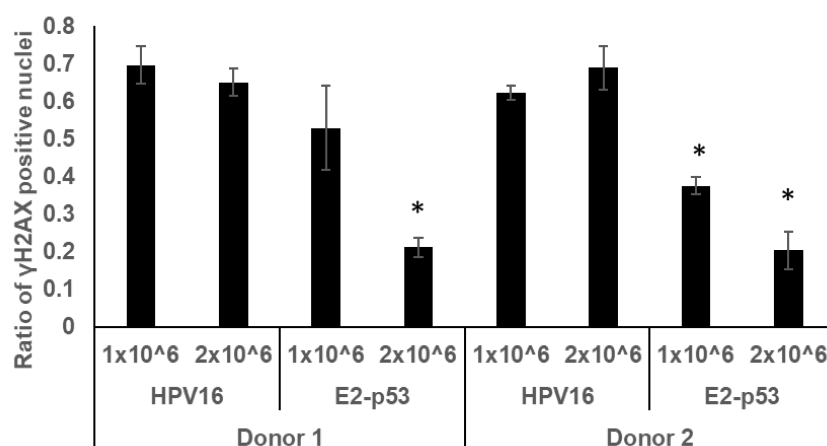

560

561 **Figure 6. Organotypically rafted HFKs immortalized by HPV16-p53 exhibit aberrant life**  
 562 **cycle with dysregulated differentiation, lower markers of viral replication and overall**  
 563 **reduced raft proliferation.** (A) Organotypic raft cultures and H&E staining of samples from figure  
 564 5. HFKs were seeded onto collagen matrices at densities of  $1 \times 10^6$  (upper panels) and  $2 \times 10^6$   
 565 (lower panels). (B). The experiment in A was repeated in a second independent HFK donor and  
 566 average raft areas were calculated for each donor using a Keyence imaging system. (C) HFK  
 567 rafts stained using indicated antibodies as markers of keratinocyte differentiation. (D) DNA  
 568 damage and viral replication marker  $\gamma$ -H2AX was stained for in HPV16 and HPV16-p53 HFK rafts.

569 (E)  $\gamma$ -H2AX staining was repeated in a second HFK donor and quantified using a Keyence imaging  
570 system.

571

572

573

574

575

576

577 **References:**

- 578 1. **zur Hausen H.** 2009. Papillomaviruses in the causation of human cancers - a brief historical  
579 account. *Virology* **384**:260-265.
- 580 2. **Marur S, D'Souza G, Westra WH, Forastiere AA.** 2010. HPV-associated head and neck cancer: a  
581 virus-related cancer epidemic. *The Lancet. Oncology* **11**:781-789.
- 582 3. **Gillison ML, Koch WM, Capone RB, Spafford M, Westra WH, Wu L, Zahurak ML, Daniel RW,**  
583 **Viglione M, Symer DE, Shah KV, Sidransky D.** 2000. Evidence for a causal association between  
584 human papillomavirus and a subset of head and neck cancers. *Journal of the National Cancer*  
585 *Institute* **92**:709-720.
- 586 4. **Gillison ML.** 2004. Human papillomavirus-associated head and neck cancer is a distinct  
587 epidemiologic, clinical, and molecular entity. *Seminars in oncology* **31**:744-754.
- 588 5. **Chaturvedi AK, Engels EA, Pfeiffer RM, Hernandez BY, Xiao W, Kim E, Jiang B, Goodman MT,**  
589 **Sibug-Saber M, Cozen W, Liu L, Lynch CF, Wentzensen N, Jordan RC, Altekruze S, Anderson WF,**  
590 **Rosenberg PS, Gillison ML.** 2011. Human papillomavirus and rising oropharyngeal cancer  
591 incidence in the United States. *Journal of clinical oncology : official journal of the American*  
592 *Society of Clinical Oncology* **29**:4294-4301.
- 593 6. **Thierry F.** 2009. Transcriptional regulation of the papillomavirus oncogenes by cellular and viral  
594 transcription factors in cervical carcinoma. *Virology* **384**:375-379.
- 595 7. **Scheffner M, Huibregtse JM, Vierstra RD, Howley PM.** 1993. The HPV-16 E6 and E6-AP complex  
596 functions as a ubiquitin-protein ligase in the ubiquitination of p53. *Cell* **75**:495-505.
- 597 8. **Mittal S, Banks L.** 2017. Molecular mechanisms underlying human papillomavirus E6 and E7  
598 oncoprotein-induced cell transformation. *Mutation research. Reviews in mutation research*  
599 **772**:23-35.
- 600 9. **Huibregtse JM, Scheffner M, Howley PM.** 1991. A cellular protein mediates association of p53  
601 with the E6 oncoprotein of human papillomavirus types 16 or 18. *The EMBO journal* **10**:4129-  
602 4135.
- 603 10. **Thomas M, Pim D, Banks L.** 1999. The role of the E6-p53 interaction in the molecular  
604 pathogenesis of HPV. *Oncogene* **18**:7690-7700.
- 605 11. **Hoppe-Seyler K, Bossler F, Braun JA, Herrmann AL, Hoppe-Seyler F.** 2018. The HPV E6/E7  
606 Oncogenes: Key Factors for Viral Carcinogenesis and Therapeutic Targets. *Trends in*  
607 *microbiology* **26**:158-168.
- 608 12. **McBride AA.** 2013. The papillomavirus E2 proteins. *Virology* **445**:57-79.
- 609 13. **Loo YM, Melendy T.** 2004. Recruitment of replication protein A by the papillomavirus E1 protein  
610 and modulation by single-stranded DNA. *Journal of virology* **78**:1605-1615.
- 611 14. **Bergvall M, Melendy T, Archambault J.** 2013. The E1 proteins. *Virology* **445**:35-56.
- 612 15. **Stanley MA, Pett MR, Coleman N.** 2007. HPV: from infection to cancer. *Biochemical Society*  
613 *transactions* **35**:1456-1460.
- 614 16. **Stanley MA.** 2012. Epithelial cell responses to infection with human papillomavirus. *Clin*  
615 *Microbiol Rev* **25**:215-222.
- 616 17. **Doorbar J, Quint W, Banks L, Bravo IG, Stoler M, Broker TR, Stanley MA.** 2012. The biology and  
617 life-cycle of human papillomaviruses. *Vaccine* **30 Suppl 5**:F55-70.
- 618 18. **Bouvard V, Storey A, Pim D, Banks L.** 1994. Characterization of the human papillomavirus E2  
619 protein: evidence of trans-activation and trans-repression in cervical keratinocytes. *The EMBO*  
620 *journal* **13**:5451-5459.
- 621 19. **McBride AA, Sakakibara N, Stepp WH, Jang MK.** 2012. Hitchhiking on host chromatin: how  
622 papillomaviruses persist. *Biochimica et biophysica acta* **1819**:820-825.



- 623 20. **Fontan CT, Das, D., Bristol, M.L., James, C.D., Wang, X., Lohner, H., Atfi, A., Morgan, I.M.** 2020.  
624 Human papillomavirus 16 E2 repression of TWIST1 transcription is a potential mediator of HPV16  
625 cancer outcomes. *mSphere* (In press).
- 626 21. **Evans MR, James CD, Bristol ML.** 2019. Human Papillomavirus 16 E2 Regulates Keratinocyte  
627 Gene Expression Relevant to Cancer and the Viral Life Cycle. **93**.
- 628 22. **Gauson EJ, Windle B, Donaldson MM, Caffarel MM, Dornan ES, Coleman N, Herzyk P,**  
629 **Henderson SC, Wang X, Morgan IM.** 2014. Regulation of human genome expression and RNA  
630 splicing by human papillomavirus 16 E2 protein. *Virology* **468-470**:10-18.
- 631 23. **Gauson EJ, Wang X, Dornan ES, Herzyk P, Bristol M, Morgan IM.** 2016. Failure to interact with  
632 Brd4 alters the ability of HPV16 E2 to regulate host genome expression and cellular movement.  
633 *Virus Res* **211**:1-8.
- 634 24. **Muller M, Demeret C.** 2012. The HPV E2-Host Protein-Protein Interactions: A Complex Hijacking  
635 of the Cellular Network. *The open virology journal* **6**:173-189.
- 636 25. **Yee KS, Vousden KH.** 2005. Complicating the complexity of p53. *Carcinogenesis* **26**:1317-1322.
- 637 26. **Vousden KH, Lane DP.** 2007. p53 in health and disease. *Nature Reviews Molecular Cell Biology*  
638 **8**:275-283.
- 639 27. **Romanova LY, Willers H, Blagosklonny MV, Powell SN.** 2004. The interaction of p53 with  
640 replication protein A mediates suppression of homologous recombination. *Oncogene* **23**:9025-  
641 9033.
- 642 28. **Lane DP.** 1992. Cancer. p53, guardian of the genome. *Nature* **358**:15-16.
- 643 29. **Gatz SA, Wiesmüller L.** 2006. p53 in recombination and repair. *Cell Death & Differentiation*  
644 **13**:1003-1016.
- 645 30. **Cheng Q, Chen J.** 2010. Mechanism of p53 stabilization by ATM after DNA damage. *Cell Cycle*  
646 **9**:472-478.
- 647 31. **Li S, Hong X, Wei Z, Xie M, Li W, Liu G, Guo H, Yang J, Wei W, Zhang S.** 2019. Ubiquitination of  
648 the HPV Oncoprotein E6 Is Critical for E6/E6AP-Mediated p53 Degradation. *Front Microbiol*  
649 **10**:2483-2483.
- 650 32. **Vande Pol SB, Klingelhutz AJ.** 2013. Papillomavirus E6 oncoproteins. *Virology* **445**:115-137.
- 651 33. **Martinez-Zapien D, Ruiz FX, Poirson J, Mitschler A, Ramirez J, Forster A, Cousido-Siah A,**  
652 **Masson M, Vande Pol S, Podjarny A, Travé G, Zanier K.** 2016. Structure of the E6/E6AP/p53  
653 complex required for HPV-mediated degradation of p53. *Nature* **529**:541-545.
- 654 34. **Zhou G, Liu Z, Myers JN.** 2016. TP53 Mutations in Head and Neck Squamous Cell Carcinoma and  
655 Their Impact on Disease Progression and Treatment Response. *Journal of cellular biochemistry*  
656 **117**:2682-2692.
- 657 35. **Poeta ML, Manola J, Goldwasser MA, Forastiere A, Benoit N, Califano JA, Ridge JA, Goodwin J,**  
658 **Kenady D, Saunders J, Westra W, Sidransky D, Koch WM.** 2007. TP53 Mutations and Survival in  
659 Squamous-Cell Carcinoma of the Head and Neck. *New England Journal of Medicine* **357**:2552-  
660 2561.
- 661 36. **Pim D, Massimi P, Banks L.** 1997. Alternatively spliced HPV-18 E6\* protein inhibits E6 mediated  
662 degradation of p53 and suppresses transformed cell growth. *Oncogene* **15**:257-264.
- 663 37. **Smotkin D, Wettstein FO.** 1986. Transcription of human papillomavirus type 16 early genes in a  
664 cervical cancer and a cancer-derived cell line and identification of the E7 protein. *Proc Natl Acad*  
665 *Sci U S A* **83**:4680-4684.
- 666 38. **Guccione E, Pim D, Banks L.** 2004. HPV-18 E6\*I modulates HPV-18 full-length E6 functions in a  
667 cell cycle dependent manner. *International journal of cancer* **110**:928-933.
- 668 39. **Schneider-Gädicke A, Schwarz E.** 1986. Different human cervical carcinoma cell lines show  
669 similar transcription patterns of human papillomavirus type 18 early genes. *The EMBO journal*  
670 **5**:2285-2292.

- 671 40. **Kösel S, Burggraf S, Engelhardt W, Olgemöller B.** 2007. Increased levels of HPV16 E6\*1  
672 transcripts in high-grade cervical cytology and histology (CIN II+) detected by rapid real-time RT-  
673 PCR amplification. *Cytopathology : official journal of the British Society for Clinical Cytology*  
674 **18**:290-299.
- 675 41. **Nulton TJ, Olex AL, Dozmorov M, Morgan IM, Windle B.** 2017. Analysis of The Cancer Genome  
676 Atlas sequencing data reveals novel properties of the human papillomavirus 16 genome in head  
677 and neck squamous cell carcinoma. *Oncotarget* **8**:17684-17699.
- 678 42. **Webster K, Parish J, Pandya M, Stern PL, Clarke AR, Gaston K.** 2000. The human papillomavirus  
679 (HPV) 16 E2 protein induces apoptosis in the absence of other HPV proteins and via a p53-  
680 dependent pathway. *The Journal of biological chemistry* **275**:87-94.
- 681 43. **Parish JL, Kowalczyk A, Chen HT, Roeder GE, Sessions R, Buckle M, Gaston K.** 2006. E2 proteins  
682 from high- and low-risk human papillomavirus types differ in their ability to bind p53 and induce  
683 apoptotic cell death. *Journal of virology* **80**:4580-4590.
- 684 44. **Brown C, Kowalczyk A, Taylor E, Morgan I, Gaston K.** 2008. P53 represses human  
685 papillomavirus type 16 DNA replication via the viral E2 protein. *Virology journal* **5**:5.
- 686 45. **Facompre ND, Sahu V, Montone KT, Harmeyer KM, Nakagawa H, Rustgi AK, Weinstein GS,  
687 Gimotty PA, Basu D.** 2017. Barriers to generating PDX models of HPV-related head and neck  
688 cancer. *The Laryngoscope* **127**:2777-2783.
- 689 46. **Facompre ND, Rajagopalan P, Sahu V, Pearson AT, Montone KT, James CD, Gleber-Netto FO,  
690 Weinstein GS, Jalaly J, Lin A, Rustgi AK, Nakagawa H, Califano JA, Pickering CR, White EA,  
691 Windle BE, Morgan IM, Cohen RB, Gimotty PA, Basu D.** 2020. Identifying predictors of HPV-  
692 related head and neck squamous cell carcinoma progression and survival through patient-  
693 derived models.
- 694 47. **Suton P, Skelin M, Rakusic Z, Dokuzovic S, Luksic I.** 2019. Cisplatin-based chemoradiotherapy  
695 vs. cetuximab-based bioradiotherapy for p16-positive oropharyngeal cancer: an updated meta-  
696 analysis including trials RTOG 1016 and De-ESCALaTE. *European archives of oto-rhino-  
697 laryngology : official journal of the European Federation of Oto-Rhino-Laryngological Societies*  
698 (EUFOS) : affiliated with the German Society for Oto-Rhino-Laryngology - Head and Neck Surgery  
699 **276**:1275-1281.
- 700 48. **Gillison ML, Trotti AM, Harris J, Eisbruch A, Harari PM, Adelstein DJ, Jordan RCK, Zhao W,  
701 Sturgis EM, Burtneß B, Ridge JA, Ringash J, Galvin J, Yao M, Koyfman SA, Blakaj DM, Razaq  
702 MA, Colevas AD, Beitler JJ, Jones CU, Dunlap NE, Seaward SA, Spencer S, Galloway TJ, Phan J,  
703 Dignam JJ, Le QT.** 2019. Radiotherapy plus cetuximab or cisplatin in human papillomavirus-  
704 positive oropharyngeal cancer (NRG Oncology RTOG 1016): a randomised, multicentre, non-  
705 inferiority trial. *Lancet (London, England)* **393**:40-50.
- 706 49. **Mehanna H, Robinson M, Hartley A, Kong A, Foran B, Fulton-Lieuw T, Dalby M, Mistry P, Sen  
707 M, O'Toole L, Al Booz H, Dyker K, Moleron R, Whitaker S, Brennan S, Cook A, Griffin M,  
708 Aynsley E, Rolles M, De Winton E, Chan A, Srinivasan D, Nixon I, Grumett J, Leemans CR, Buter  
709 J, Henderson J, Harrington K, McConkey C, Gray A, Dunn J.** 2019. Radiotherapy plus cisplatin or  
710 cetuximab in low-risk human papillomavirus-positive oropharyngeal cancer (De-ESCALaTE HPV):  
711 an open-label randomised controlled phase 3 trial. *Lancet (London, England)* **393**:51-60.
- 712 50. **Jeremic B, Shibamoto Y, Stanisavljevic B, Milojevic L, Milicic B, Nikolic N.** 1997. Radiation  
713 therapy alone or with concurrent low-dose daily either cisplatin or carboplatin in locally  
714 advanced unresectable squamous cell carcinoma of the head and neck: a prospective  
715 randomized trial. *Radiotherapy and oncology : journal of the European Society for Therapeutic  
716 Radiology and Oncology* **43**:29-37.

- 717 51. **Scarth JA, Patterson MR, Morgan EL, Macdonald A.** 2021. The human papillomavirus  
718 oncoproteins: a review of the host pathways targeted on the road to transformation. *The*  
719 *Journal of general virology* **102**.
- 720 52. **White EA, Kramer RE, Tan MJA, Hayes SD, Harper JW, Howley PM.** 2012. Comprehensive  
721 analysis of host cellular interactions with human papillomavirus E6 proteins identifies new E6  
722 binding partners and reflects viral diversity. *Journal of virology* **86**:13174-13186.
- 723 53. **Prabhakar AT, James CD, Das D, Otoa R, Day M, Burgner J, Fontan CT, Wang X, Glass SH,**  
724 **Wieland A, Donaldson MM, Bristol ML, Li R.** 2021. CK2 Phosphorylation of Human  
725 Papillomavirus 16 E2 on Serine 23 Promotes Interaction with TopBP1 and Is Critical for E2  
726 Interaction with Mitotic Chromatin and the Viral Life Cycle. *mBio* **12**(5) e0116321.
- 727 54. **Myers JE, Zwolinska K, Sapp MJ, Scott RS.** 2020. An Exonuclease V-qPCR Assay to Analyze the  
728 State of the Human Papillomavirus 16 Genome in Cell Lines and Tissues. *Curr Protoc Microbiol*  
729 **59**:e119.
- 730 55. **Myers JE, Guidry JT, Scott ML, Zwolinska K, Raikhy G, Prasai K, Bienkowska-Haba M, Bodily JM,**  
731 **Sapp MJ, Scott RS.** 2019. Detecting episomal or integrated human papillomavirus 16 DNA using  
732 an exonuclease V-qPCR-based assay. *Virology* **537**:149-156.
- 733 56. **James CD, Fontan CT, Otoa R, Das D, Prabhakar AT, Wang X, Bristol ML, Morgan IM.** 2020.  
734 Human Papillomavirus 16 E6 and E7 Synergistically Repress Innate Immune Gene Transcription.  
735 *mSphere* **5**.
- 736 57. **Mehta K, Laimins L.** 2018. Human Papillomaviruses Preferentially Recruit DNA Repair Factors to  
737 Viral Genomes for Rapid Repair and Amplification. *mBio* **9**:e00064-00018.
- 738 58. **Gauson EJ, Donaldson MM, Dornan ES, Wang X, Bristol M, Bodily JM, Morgan IM.** 2015.  
739 Evidence supporting a role for TopBP1 and Brd4 in the initiation but not continuation of human  
740 papillomavirus 16 E1/E2-mediated DNA replication. *Journal of virology* **89**:4980-4991.
- 741 59. **Dahlet T, Argüeso Lleida A, Al Adhami H, Dumas M, Bender A, Ngondo RP, Tanguy M, Vallet J,**  
742 **Auclair G, Bardet AF, Weber M.** 2020. Genome-wide analysis in the mouse embryo reveals the  
743 importance of DNA methylation for transcription integrity. *Nature communications* **11**:3153-  
744 3153.
- 745 60. **Smith ZD, Meissner A.** 2013. DNA methylation: roles in mammalian development. *Nature*  
746 *reviews. Genetics* **14**:204-220.
- 747 61. **Estève P-O, Chin HG, Pradhan S.** 2005. Human maintenance DNA (cytosine-5)-  
748 methyltransferase and p53 modulate expression of p53-repressed promoters. *Proc Natl Acad Sci*  
749 *U S A* **102**:1000.
- 750 62. **Chappell WH, Gautam D, Ok ST, Johnson BA, Anacker DC, Moody CA.** 2015. Homologous  
751 Recombination Repair Factors Rad51 and BRCA1 Are Necessary for Productive Replication of  
752 Human Papillomavirus 31. *Journal of virology* **90**:2639-2652.
- 753 63. **Anacker DC, Gautam D, Gillespie KA, Chappell WH, Moody CA.** 2014. Productive replication of  
754 human papillomavirus 31 requires DNA repair factor Nbs1. *Journal of virology* **88**:8528-8544.
- 755 64. **Gillespie KA, Mehta KP, Laimins LA, Moody CA.** 2012. Human papillomaviruses recruit cellular  
756 DNA repair and homologous recombination factors to viral replication centers. *Journal of*  
757 *virology* **86**:9520-9526.
- 758 65. **Bristol ML, James CD, Wang X, Fontan CT, Morgan IM.** 2020. Estrogen Attenuates the Growth  
759 of Human Papillomavirus-Positive Epithelial Cells. *mSphere* **5**:e00049-00020.
- 760 66. **James CD, Prabhakar AT, Otoa R, Evans MR, Wang X, Bristol ML, Zhang K, Li R, Morgan IM.**  
761 2019. SAMHD1 Regulates Human Papillomavirus 16-Induced Cell Proliferation and Viral  
762 Replication during Differentiation of Keratinocytes. *mSphere* **4**:e00448-00419.

- 763 67. **Evans MR, James CD, Loughran O, Nulton TJ, Wang X, Bristol ML, Windle B, Morgan IM.** 2017.  
764 An oral keratinocyte life cycle model identifies novel host genome regulation by human  
765 papillomavirus 16 relevant to HPV positive head and neck cancer. *Oncotarget* **8**:81892-81909.  
766 68. **Massimi P, Pim D, Bertoli C, Bouvard V, Banks L.** 1999. Interaction between the HPV-16 E2  
767 transcriptional activator and p53. *Oncogene* **18**:7748-7754.  
768 69. **Końca K, Lankoff A, Banasik A, Lisowska H, Kuszewski T, Gózdź S, Koza Z, Wojcik A.** 2003. A  
769 cross-platform public domain PC image-analysis program for the comet assay. *Mutation*  
770 *research* **534**:15-20.  
771 70. **James CD, Das D, Morgan EL.** 2020. Werner Syndrome Protein (WRN) Regulates Cell  
772 Proliferation and the Human Papillomavirus 16 Life Cycle during Epithelial Differentiation. **5**.  
773 71. **Wieland A, Patel MR, Cardenas MA, Eberhardt CS, Hudson WH.** 2020. Defining HPV-specific B  
774 cell responses in patients with head and neck cancer.

775
